# Supplementary material for: Evolution of antibiotic resistance at low antibiotic concentrations including selection below the minimal selective concentration
Source: PubMed Central journal article supplement (PMC7471295; doi:10.1038/s42003-020-01176-w), 2020-09-03
Supplement: 42003_2020_1176_MOESM4_ESM.pdf [file 42003_2020_1176_MOESM4_ESM.pdf]

## Description of Additional Supplementary Files

**File Name:** **Supplementary Data 1**

**Description:** the source data for figures
